# Supplementary material
Source: Springer Nature journal article supplement (https://www.springermedizin.de/resource/supplementary/12885_2013_4450_MOESM1_ESM.pdf/9466408)
Supplement: MOESM1 [file 9466408]

## Additional file 1 - Supplementary table 1

### No of tumor samples with available data for expression analysis by different methods

| Type of expression analysis                                           | Cohort A<br>(No. of samples) | Cohort B (No. of<br>samples) |
|-----------------------------------------------------------------------|------------------------------|------------------------------|
| RT-PCR STAT1                                                          | 96                           | 36                           |
| RT-PCR IRF1                                                           | 96                           | 36                           |
| RT-PCR SOCS1                                                          | 96                           | 0                            |
| RT-PCR IFN- $\gamma$                                                  | 92                           | 36                           |
| RT-PCR CD68                                                           | 74                           | 36                           |
| RT-PCR CD45                                                           | 74                           | 0                            |
| RT-PCR FOXP3                                                          | 74                           | 36                           |
| RT-PCR CD163                                                          | 65                           | 21                           |
| RT-PCR CXCL9                                                          | 74                           | 35                           |
| RT-PCR CXCL10                                                         | 74                           | 36                           |
| RT-PCR CXCL11                                                         | 72                           | 34                           |
| RT-PCR IFIT                                                           | 74                           | 36                           |
| RT-PCR IFITM1                                                         | 74                           | 36                           |
| RT-PCR MX1                                                            | 74                           | 36                           |
| RT-PCR PD-L1                                                          | 63                           | 28                           |
| RT-PCR PD-L2                                                          | 73                           | 36                           |
| RT-PCR PD-1                                                           | 47                           | 0                            |
| Protein extracts for immunoblotting of<br>total Stat1 and pY701-STAT1 | 39                           | 0                            |
| Protein extracts for immunoblotting of<br>pS727-STAT1                 | 27                           | 0                            |
| Protein extracts for CXCL10 ELISA                                     | 10                           | 0                            |
| Paraffin blocks for STAT1<br>immunohistochemistry                     | 83                           | 0                            |
